# Supplementary material for: Attractin Participates in Schizophrenia by Affecting Testosterone Levels
Source: PubMed Central journal article supplement (PMC8636034; doi:10.3389/fcell.2021.755165), 2021-11-11
Supplement: Data_Sheet_1.pdf [file Data_Sheet_1.pdf]

# Supplementary Material

## 1 Supplementary Data

### 1.1 Supplementary Figures

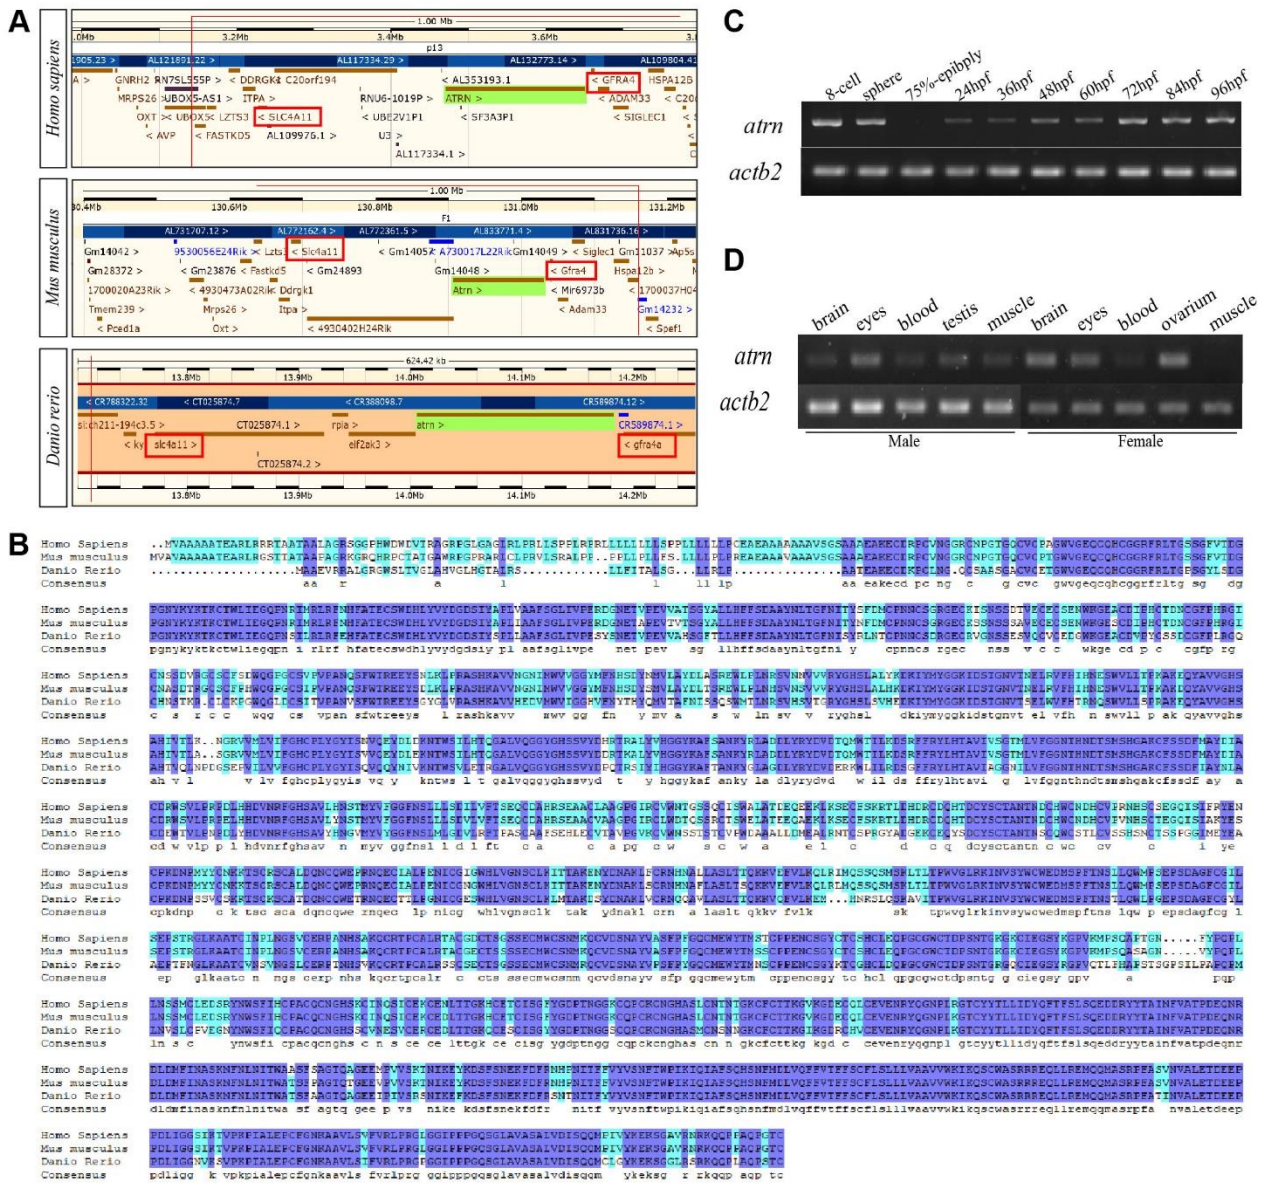

**Supplementary Figure 1.** Expression pattern of zebrafish ortholog gene *atrn*. (A) Syngeneic analysis of human, mice and zebrafish *ATRN* genes using the Ensembl genome browser (<http://ensembl.org>). In these three different species, there are two genes, *gfra4* and *slca11*, near the *ATRN* gene. (B) *ATRN* protein sequence alignment of human, mice and zebrafish attractin. (C) Semi-quantitative RT-

PCR detection of zebrafish *atrn* mRNA level at different development stages. (D) Semi-quantitative RT-PCR detection of zebrafish *atrn* mRNA level of adult zebrafish tissue.

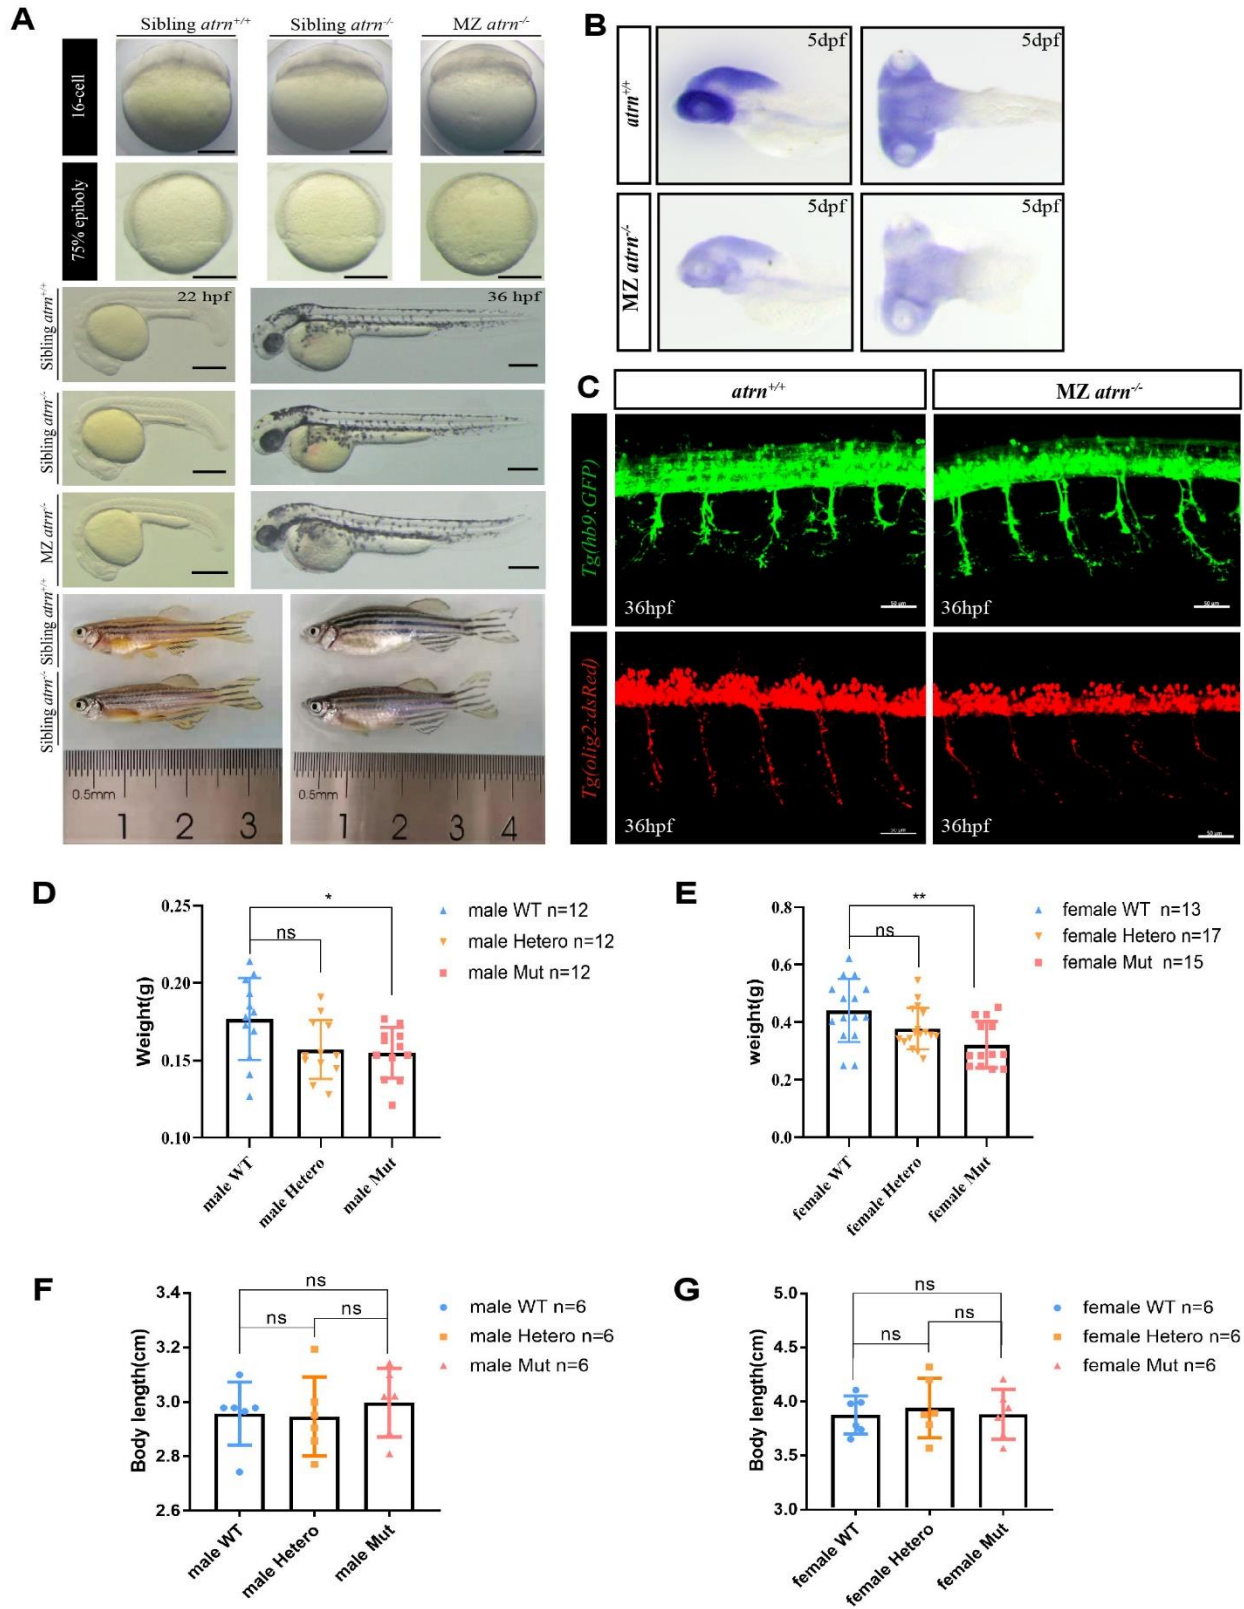

**Supplementary Figure 2.** There are no obvious developmental defects in *atr<sup>n</sup>-/-*. (A) The mutant can grow up normally with no obvious defects, and they can reproduce normally and lay eggs. (B) Reduced expression of *atr<sup>n</sup>* mRNA in *atr<sup>n</sup>+/+* and MZ *atr<sup>n</sup>-/-* larvae (5dpf) analyzed by WISH. (C) The development of motor neurons and oligodendrocytes was not affected in MZ *atr<sup>n</sup>-/-*. (D) We measured the body weight of three genotype male adult zebrafishes, 12 in each group. The male mutant weigh much more than the wildtype and the heterozygous. (E) Identically, we measured 13 female *atr<sup>n</sup>+/+* zebrafishes, 17 female *atr<sup>n</sup>+/-* zebrafishes and 15 female *atr<sup>n</sup>-/-* zebrafishes, and the results as before in the male zebrafishes. (F-G) The length of different genotype adult zebrafish has no significantly difference. Data are shown as mean  $\pm$  SD; \*,  $p < 0.05$ , \*\*,  $p < 0.01$ , \*\*\*,  $p < 0.001$ .



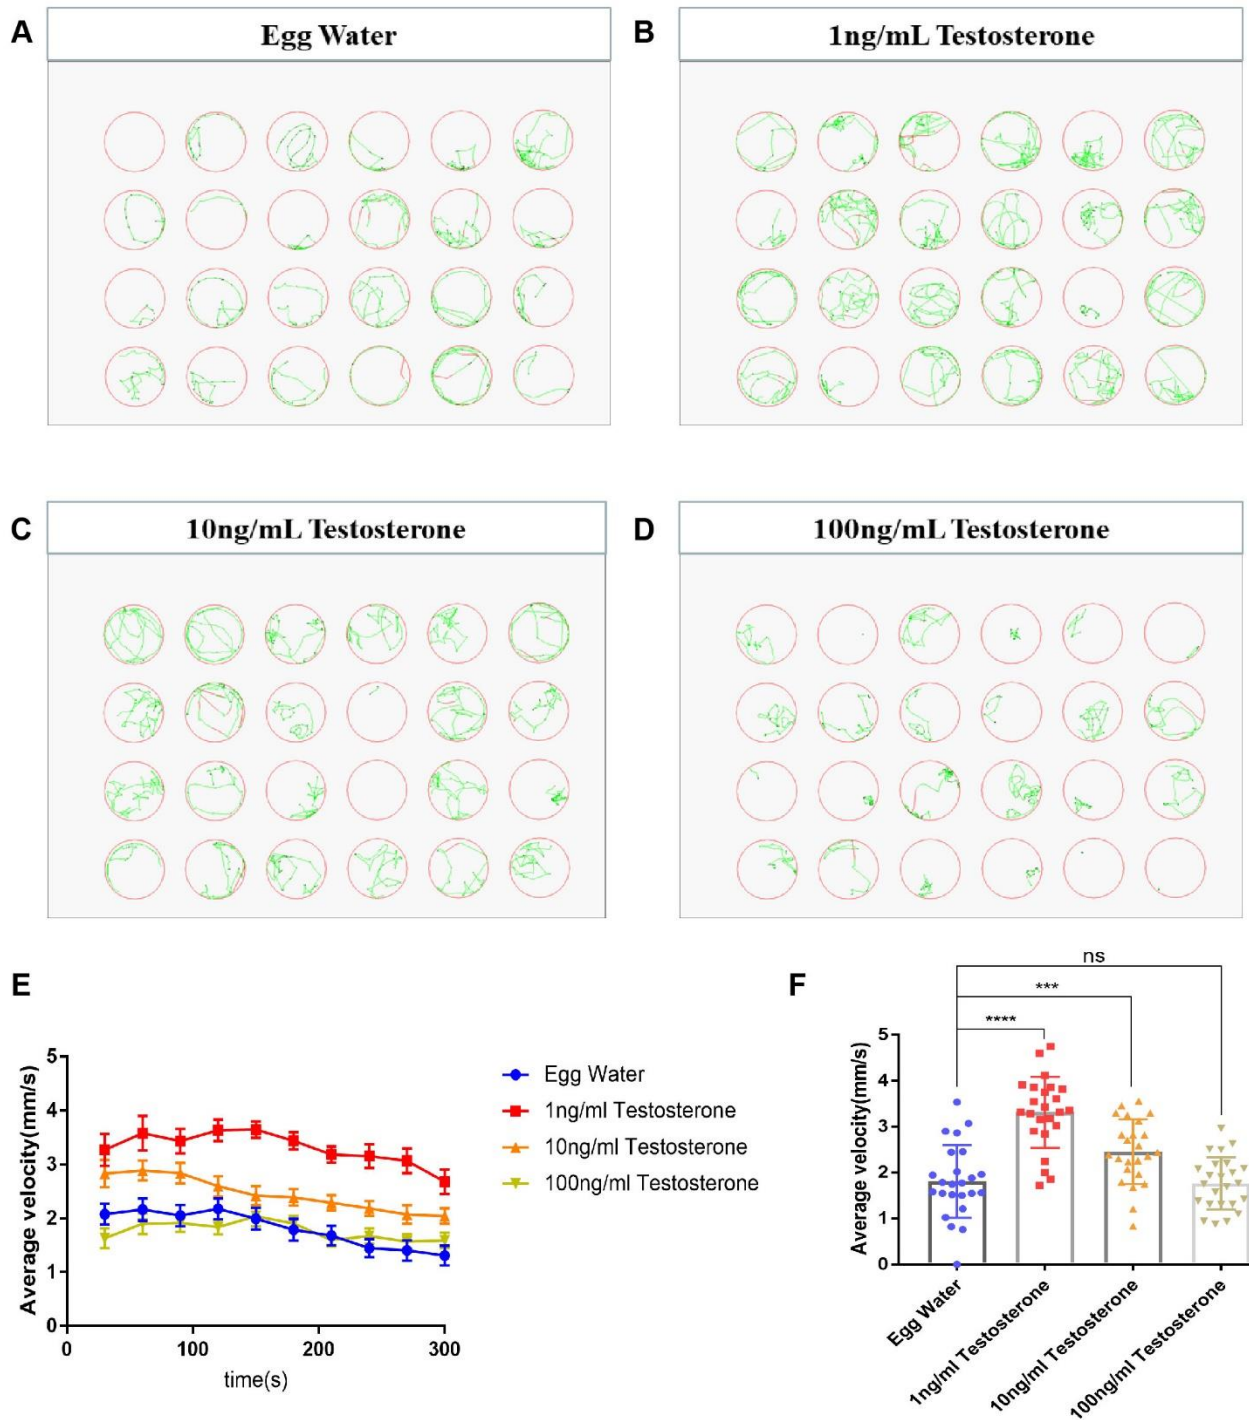

**Supplementary Figure 3. The average velocity of external testosterone treated larvae is faster than the control.** Locus diagram of the control group (A), 1ng/mL testosterone treated group (B), 10ng/mL testosterone treated group (C) and 100ng/mL testosterone treated group (D) at 5dpf. (E) The average velocity-time graph of testosterone treated larvae at 5dpf. (F) The average swimming speed of larvae during 5min period at 5dpf. Data are shown as mean  $\pm$  SD; \*\*\*,  $p < 0.001$ ; \*\*\*\*,  $p < 0.0001$ ; ns, no significance ( $p > 0.05$ ).

**Table S1 Testosterone levels in men with mental disorders aged 20-49 years.**

| Gender                               | Male (20-49) |             |           |       | $\chi^2$ , df | <i>p</i> value |
|--------------------------------------|--------------|-------------|-----------|-------|---------------|----------------|
|                                      | Low T        | Medium T    | High T    | Total |               |                |
| <b>Control</b>                       | 5 (8.3%)     | 51 (85%)    | 4 (6.7%)  | 60    |               |                |
| <b>Epilepsy</b>                      | 3 (14.2%)    | 17 (81%)    | 1 (4.8%)  | 21    | 0.6798, 2     | 0.7118         |
| <b>Anxiety disorders</b>             | 9 (7.8%)     | 101 (87.8%) | 5 (4.4%)  | 115   | 0.4612, 2     | 0.7941         |
| <b>Schizophrenia</b>                 | 215 (26.1%)  | 589 (71.4%) | 21 (2.5%) | 825   | 11.87, 2      | 0.0027*        |
| <b>Obsessive-compulsive disorder</b> | 2 (6.1%)     | 31 (93.9%)  | 0         | 33    | 2.539, 2      | 0.281          |
| <b>Insomnia</b>                      | 0            | 12 (100%)   | 0         | 12    | 2.057, 2      | 0.3575         |
| <b>Bipolar disorder</b>              | 44 (22.2%)   | 141 (71.2%) | 13 (6.6%) | 198   | 5.854, 2      | 0.0536         |
| <b>Depression disorder</b>           | 59 (11.4%)   | 442 (85.3%) | 17 (3.3%) | 518   | 2.15, 2       | 0.3413         |
| <b>Undiagnosed mental disorder</b>   | 134 (19.5%)  | 516 (75.2%) | 36 (5.3%) | 686   | 4.616, 2      | 0.0994         |
| <b>Mania</b>                         | 14 (12.6%)   | 90 (81.1%)  | 7 (6.3%)  | 111   | 0.7223, 2     | 0.6969         |

\*,  $P < 0.05$ ; \*\*,  $P < 0.01$ .

**Table S2 Testosterone levels in women with mental disorders aged 20-49 years.**

| Gender | Female (20-49) |          |        |       | $\chi^2$ , df | <i>p</i> value |
|--------|----------------|----------|--------|-------|---------------|----------------|
|        | Low T          | Medium T | High T | Total |               |                |

|                                      |            |             |             |      |             |          |
|--------------------------------------|------------|-------------|-------------|------|-------------|----------|
| <b>Control</b>                       | 8 (6.6%)   | 104 (86%)   | 9 (7.4%)    | 121  |             |          |
| <b>Epilepsy</b>                      | 1 (2.9%)   | 33 (94.3%)  | 1 (2.9%)    | 35   | 1.767,<br>2 | 0.4134   |
| <b>Anxiety disorders</b>             | 16 (8.1%)  | 159 (80.3%) | 23 (11.6%)  | 198  | 1.813,<br>2 | 0.4039   |
| <b>Schizophrenia</b>                 | 42 (4.0%)  | 785 (75%)   | 219 (20.9%) | 1046 | 13.51,<br>2 | 0.0012** |
| <b>Obsessive-compulsive disorder</b> | 4 (19.0%)  | 17 (81%)    | 0           | 21   | 4.889,<br>2 | 0.0868   |
| <b>Insomnia</b>                      | 1 (4.0%)   | 24 (96%)    | 0           | 25   | 2.327,<br>2 | 0.3123   |
| <b>Bipolar disorder</b>              | 16 (3.8%)  | 314 (74.4%) | 92 (21.8%)  | 422  | 13.75,<br>2 | 0.001**  |
| <b>Depression disorder</b>           | 96 (10.0%) | 754 (78.4%) | 112 (11.6%) | 962  | 3.748,<br>2 | 0.1535   |
| <b>Undiagnosed mental disorder</b>   | 56 (5.8%)  | 704 (73.1%) | 203 (21.1%) | 963  | 12.72,<br>2 | 0.0017** |
| <b>Mania</b>                         | 5 (3.8%)   | 103 (77.4%) | 25 (18.8%)  | 133  | 7.677,<br>2 | 0.0215*  |

\*,  $P < 0.05$ ; \*\*,  $P < 0.01$ .

**Table S3 Testosterone levels in men with mental disorders aged over 50 years.**

| <b>Gender</b>   | <b>Male (&gt;50)</b> |                 |               |    | <b>Total</b> | <b><math>\chi^2</math>, <i>df</i></b> | <b><i>p</i> value</b> |
|-----------------|----------------------|-----------------|---------------|----|--------------|---------------------------------------|-----------------------|
|                 | <b>Low T</b>         | <b>Medium T</b> | <b>High T</b> |    |              |                                       |                       |
| <b>Control</b>  | 7 (28.0%)            | 18 (72.0%)      | 0             | 25 |              |                                       |                       |
| <b>Epilepsy</b> | 1 (16.7%)            | 5 (83.3%)       | 0             | 6  | 0.3246,<br>1 | 0.5689                                |                       |

|                                               |               |                |              |     |              |                 |
|-----------------------------------------------|---------------|----------------|--------------|-----|--------------|-----------------|
| <b>Anxiety disorders</b>                      | 2 (1.9%)      | 97 (90.7%)     | 8 (7.4%)     | 107 | 22.97, 2     | <0.0001***<br>* |
| <b>Schizophrenia</b>                          | 29<br>(12.6%) | 193<br>(83.9%) | 8 (3.5%)     | 230 | 5.04, 2      | 0.0805          |
| <b>Obsessive-<br/>compulsive<br/>disorder</b> | 0             | 1 (100%)       | 0            | 1   | 0.3832,<br>1 | 0.619           |
| <b>Insomnia</b>                               | 3 (9.1%)      | 26 (78.8%)     | 4<br>(12.1%) | 33  | 6.067, 2     | 0.0482*         |
| <b>Bipolar disorder</b>                       | 11<br>(18.6%) | 44 (74.6%)     | 4 (6.8%)     | 59  | 2.428, 2     | 0.297           |
| <b>Depression<br/>disorder</b>                | 20 (5.7%)     | 303<br>(87.1%) | 25<br>(7.2%) | 348 | 18.37, 2     | 0.0001***       |
| <b>Mental disorder</b>                        | 23<br>(14.0%) | 133<br>(81.1%) | 8 (4.9%)     | 164 | 4.114, 2     | 0.1279          |
| <b>Mania</b>                                  | 6 (16.7%)     | 26 (72.2%)     | 4<br>(11.1%) | 36  | 3.667, 2     | 0.1598          |

\*,  $P < 0.05$ ; \*\*\*,  $P < 0.001$ ; \*\*\*\*,  $P < 0.0001$ .

**Table S4 Testosterone levels in men with mental disorders aged over 50 years.**

| <b>Gender</b>            | <b>Female (&gt;50)</b> |                 |               |              | <b><math>\chi^2</math>, df</b> | <b><i>p</i><br/>value</b> |
|--------------------------|------------------------|-----------------|---------------|--------------|--------------------------------|---------------------------|
|                          | <b>Low T</b>           | <b>Medium T</b> | <b>High T</b> | <b>Total</b> |                                |                           |
| <b>Control</b>           | 6 (14.6%)              | 30 (73.2%)      | 5 (12.2%)     | 41           |                                |                           |
| <b>Epilepsy</b>          | 1 (25%)                | 3 (75%)         | 0             | 4            | 0.7412, 2                      | 0.6903                    |
| <b>Anxiety disorders</b> | 21 (9.6%)              | 190 (87.2%)     | 7 (3.2%)      | 218          | 7.634, 2                       | 0.022*                    |
| <b>Schizophrenia</b>     | 33 (8.9%)              | 305 (82.4%)     | 32 (8.6%)     | 370          | 2.175, 2                       | 0.3371                    |



|                                      |            |             |           |     |           |        |
|--------------------------------------|------------|-------------|-----------|-----|-----------|--------|
| <b>Obsessive-compulsive disorder</b> | 0          | 7 (87.5%)   | 1 (12.5%) | 8   | 1.353, 2  | 0.5083 |
| <b>Insomnia</b>                      | 6 (12.5%)  | 42 (87.5%)  | 0         | 48  | 6.49, 2   | 0.039* |
| <b>Bipolar disorder</b>              | 11 (10.7%) | 89 (86.4%)  | 3 (2.9%)  | 103 | 5.559, 2  | 0.0621 |
| <b>Depression disorder</b>           | 69 (9.8%)  | 596 (84.7%) | 39 (5.5%) | 704 | 4.413, 2  | 0.1101 |
| <b>Mental disorder</b>               | 28 (12.2%) | 186 (81.2%) | 15 (6.6%) | 229 | 1.938, 2  | 0.3795 |
| <b>Mania</b>                         | 2 (12.5%)  | 11 (68.8%)  | 3 (18.8%) | 16  | 0.4209, 2 | 0.8102 |

\* $P < 0.05$ .

**Table S5 Testosterone levels of 14 ATRN-mutated schizophrenia patients were tested at different time points.**

| <b>Patient s</b> | <b>Gender</b> | <b>Age</b> | <b>Test Date</b> | <b>Testosterone (ng/ml)</b> | <b>Testosterone (nmol/L)</b> | <b>Change</b> |
|------------------|---------------|------------|------------------|-----------------------------|------------------------------|---------------|
| 1                | Female        | 49         | 2010/8/11        | 0.1600                      | 0.5024                       | High          |
| 2                | Male          | 40         | 2011/5/27        | 0.42                        | 1.3188                       | Low           |
| 3                | Female        | 43         | 2011/10/8        | 0.28                        | 0.8792                       | High          |
| 4                | Female        | 36         | 2013/10/22       | 0.162                       | 0.50868                      | High          |
| 5                | Female        | 57         | 2019/5/16        | 0.216                       | 0.67824                      | High          |
| 6                | Female        | 32         | 2013/10/23       | 0.389                       | 1.22146                      | High          |
| 7                | Female        | 34         | 2018/5/15        | 0.402                       | 1.26228                      | High          |
| 8                | Male          | 20         | 2013/3/6         | 3.68                        | 11.5552                      | --            |
| 9                | Female        | 36         | 2014/2/24        | 0.362                       | 1.13668                      | --            |

## Supplementary Material

|    |        |    |            |        |           |      |
|----|--------|----|------------|--------|-----------|------|
| 10 | Female | 48 | 2016/10/21 | 0.239  | 0.75046   | --   |
| 11 | Male   | 25 | 2019/1/24  | 4.4236 | 13.890104 | --   |
| 12 | Male   | 17 | 2018/11/6  | 7.0288 | 22.070432 | --   |
| 13 | Female | 42 | 2011/10/13 | 0.89   | 2.7946    | High |
| 14 | Male   | 28 | 2018/6/20  | 0.257  | 0.80698   | Low  |

High: Testosterone level is higher than the normal range; Low: Testosterone level is lower than the normal range; --: Testosterone level is within the normal range.
